# Supplementary material for: Comparison of Physicochemical Properties of Silver and Gold Nanocomposites Based on Potato Starch in Distilled and Cold Plasma-Treated Water
Source: MDPI journal article supplement (doi:10.3390/ijms24032200), 2023-01-22
Supplement: s1 [file s1]

**Comparison of physicochemical properties of silver and gold nanocomposites based on  
potato starch in distilled and cold plasma-treated water**

Magdalena Janik<sup>1</sup>, Karen Khachatryan<sup>1\*</sup>, Gohar Khachatryan<sup>1</sup>, Magdalena Krystijan<sup>1</sup>,

Zdzisław Oszczęda<sup>2</sup>

<sup>1</sup>Faculty of Food Technology, University of Agriculture, ul. Balicka 122, 30-149 Kraków, Poland;

<sup>2</sup>Nantes Nanotechnological Systems, Dolnych Młynów Street 24, 59-700 Bolesławiec, Poland

\*Corresponding author: karen.khachatryan@urk.edu.pl

**Supplementary data:**

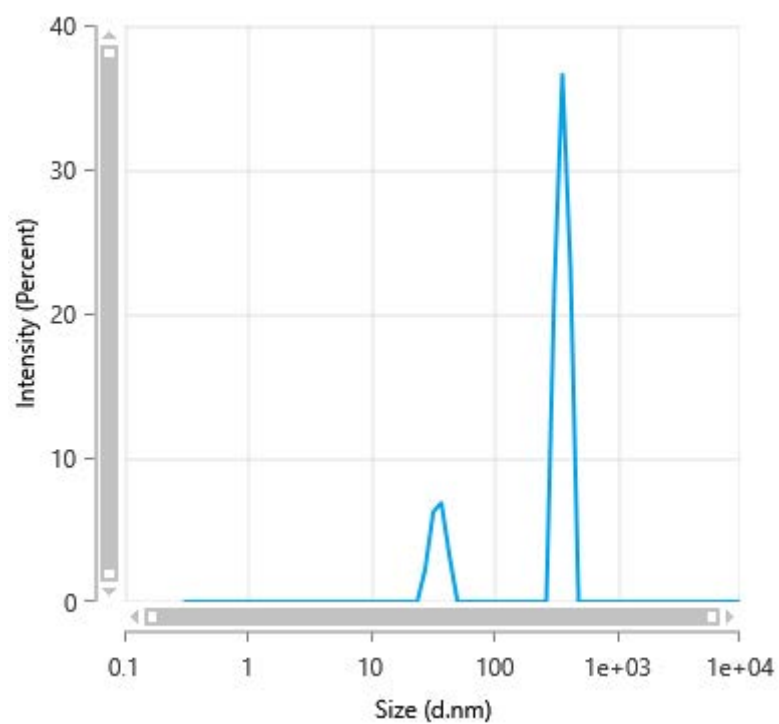

Figure S1. Size distribution by intensity of PS/Ag.

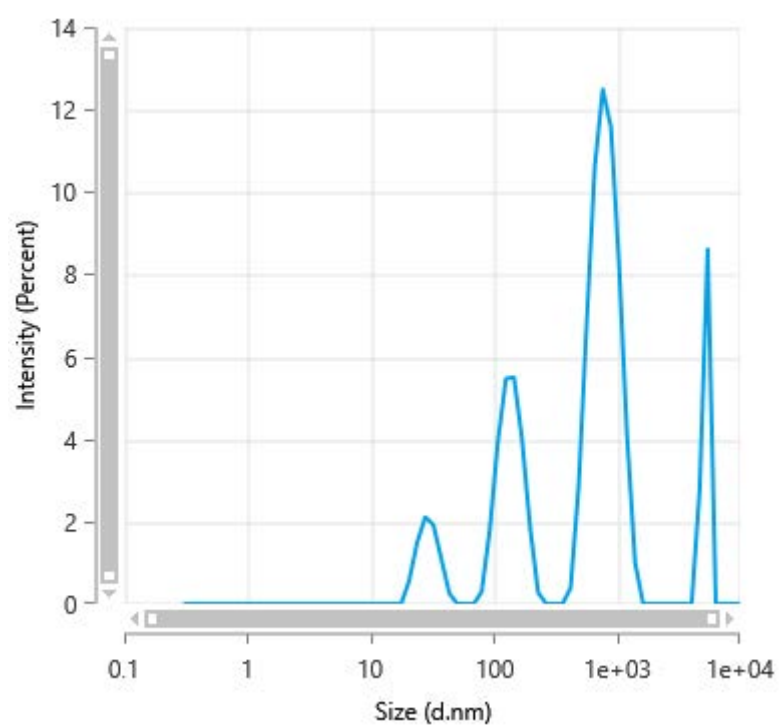

Figure S2. Size distribution by intensity of PSP/Ag

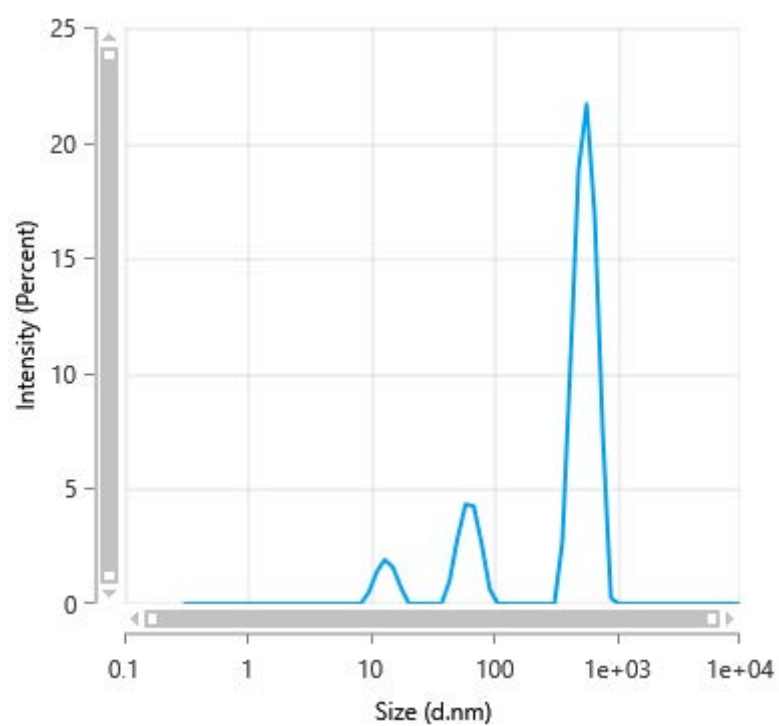

Figure S3. Size distribution by intensity of PS/Au

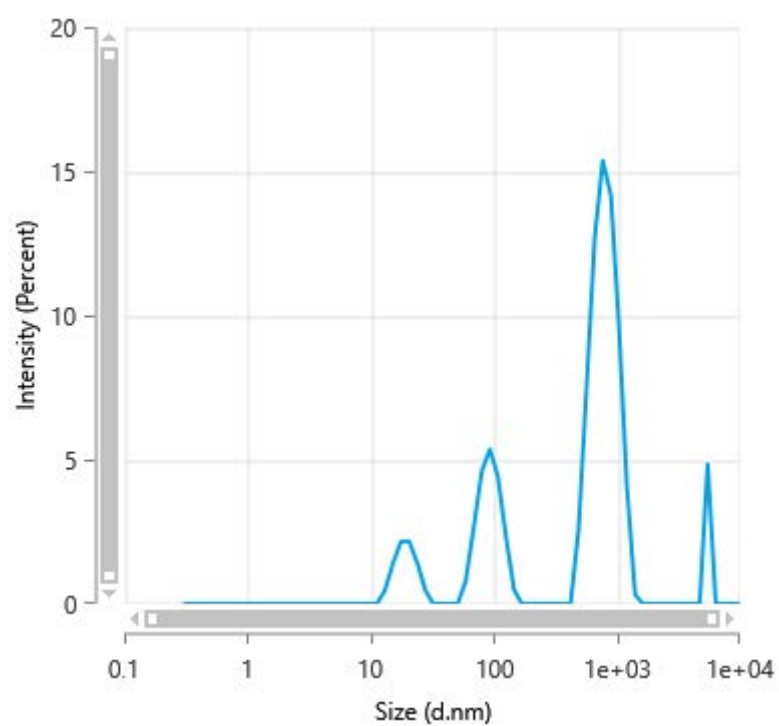

Figure S4. Size distribution by intensity of PSP/Au
